# Supplementary figures and images for: Elucidation of epithelial–mesenchymal transition-related pathways in a triple-negative breast cancer cell line model by multi-omics interactome analysis
Source: Royal Society of Chemistry journal article supplement (doi:10.1039/c4ib00137k), 2014-01-01

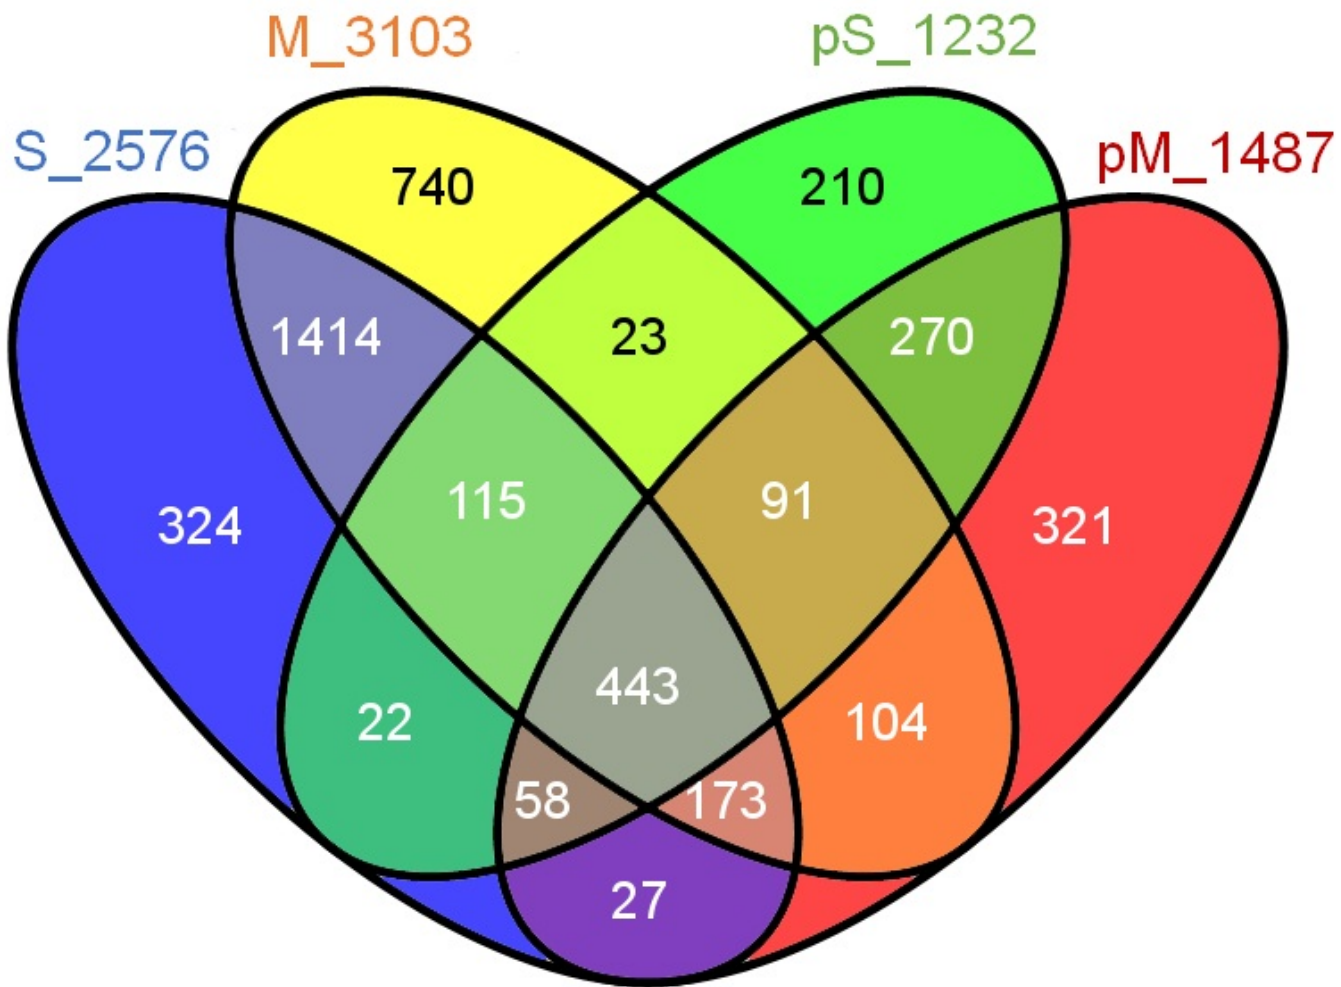

Supplement: c4ib00137k4.pdf [file c4ib00137k4.pdf]

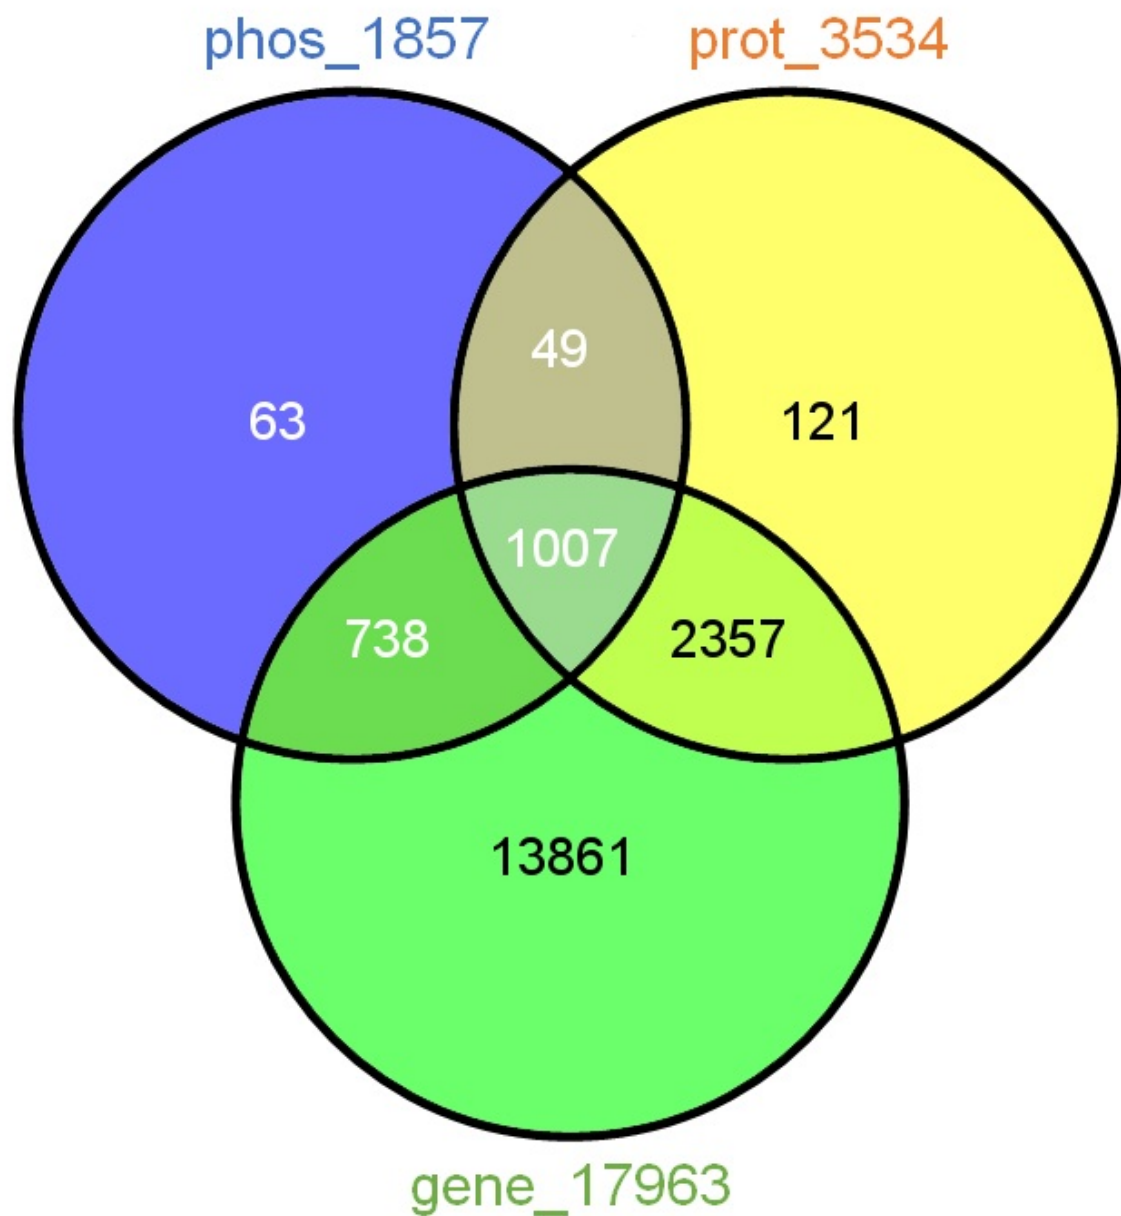

Supplement: c4ib00137k5.pdf [file c4ib00137k5.pdf]
